# Supplementary material for: A Second-Generation Device for Automated Training and Quantitative Behavior Analyses of Molecularly-Tractable Model Organisms
Source: PubMed Central journal article supplement (PMC3003703; doi:10.1371/journal.pone.0014370), 2010-12-17

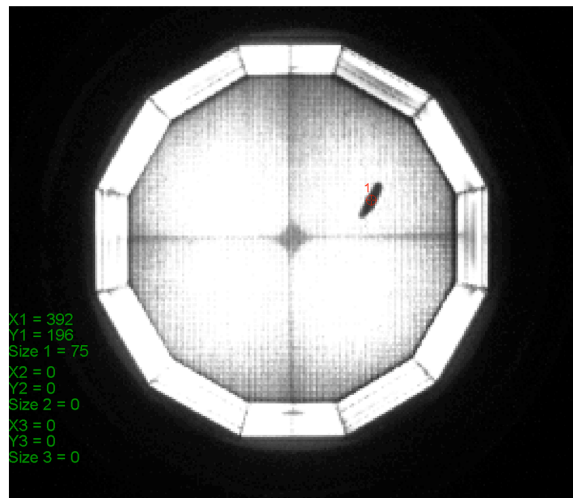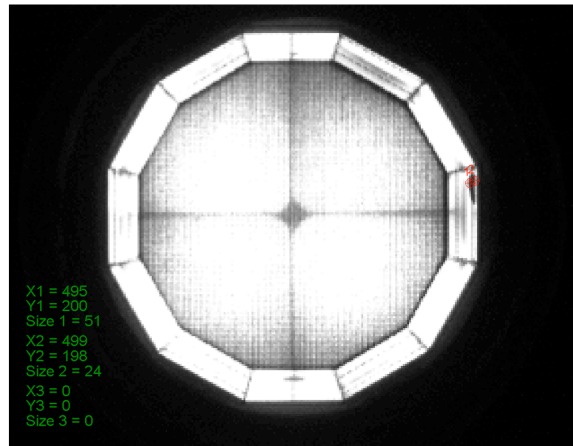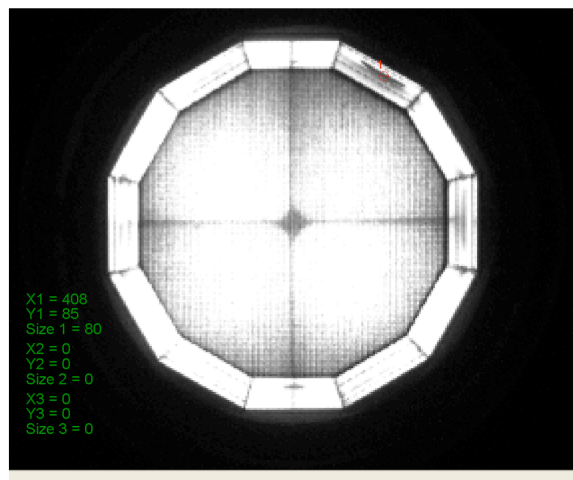

Supplement: pone.0014370.s004.pdf [file pone.0014370.s004.pdf]
